# Supplementary material for: Microbiologically Pure Cotton Fabrics Treated with Tetrabutylammonium OXONE as Mild Disinfection Agent
Source: MDPI journal article supplement (doi:10.3390/ma15217749), 2022-11-03

## Supplementary Information

# Microbiologically Pure Cotton Fabrics Treated with Tetrabutylammonium OXONE as Mild Disinfection Agent

Bogdan Bujnicki <sup>1,\*</sup>, Przemysław Sowinski <sup>1,\*</sup>, Tomasz Makowski <sup>1</sup>, Dorota Krasowska <sup>1</sup>, Patrycja Pokora-Sobczak <sup>1</sup>, Inna Shkyluk <sup>1,2</sup>, Józef Drabowicz <sup>1,3,\*</sup> and Ewa Piorkowska <sup>1</sup>

<sup>1</sup> Centre of Molecular and Macromolecular Studies Polish Academy of Sciences, Sienkiewicza 112, 90-363 Lodz, Poland

<sup>2</sup> The Bio-Med-Chem Doctoral School of the University of Lodz and Lodz Institutes of the Polish Academy of Sciences, University of Lodz, Banacha 12/16, 90-237 Lodz, Poland

<sup>3</sup> Institute of Chemistry, Jan Długosz University in Częstochowa, Armii Krajowej 13/15, 42-200 Częstochowa, Poland

\* Correspondence: bogbujni@cbmm.lodz.pl (B.B.); przem\_so@cbmm.lodz.pl (P.S.); draj@cbmm.lodz.pl (J.D.); Tel.: +48-42-6803234 (B.B.); +48-42-6803316 (P.S.); +48-42-6803234 (J.D.)

### Standard washing procedure of cotton fabric:

1. two prewashing steps (in consecutive chambers) at 45 °C for 5 min each
2. four main washing steps at 65 °C for 5 min each
3. three rinsing steps for 5 min each
4. pressing for 3 min to decrease the amount of water
5. drying at 120 – 140 °C
6. ironing at 180 °C for 30 – 60 s.

During the prewashing and washing the weight ratio of cotton fabric to water was 1:4 whereas during rinsing it was 1: 6.

### Synthesis of TBA-OXONE

OXONE (1 equiv.) and varying amounts of nBu<sub>4</sub>NHSO<sub>4</sub> were used to extract TBA-OXONE into CH<sub>2</sub>Cl<sub>2</sub>. By utilizing one equivalent of nBu<sub>4</sub>NHSO<sub>4</sub> in a single extraction, 88% of the oxidative equivalence is obtained in soluble form.

Additionally, it was not necessary to mix the solids for a longer time, because the simple mixing of both solids in water followed by immediate extraction provided reproducible results. The success of this procedure is attributed to the fact that

KHSO<sub>5</sub> dissolves preferentially over KHSO<sub>4</sub> and K<sub>2</sub>SO<sub>4</sub>, and that nBu<sub>4</sub>NHSO<sub>5</sub> is more soluble in dichloromethane than nBu<sub>4</sub>NHSO<sub>4</sub>.

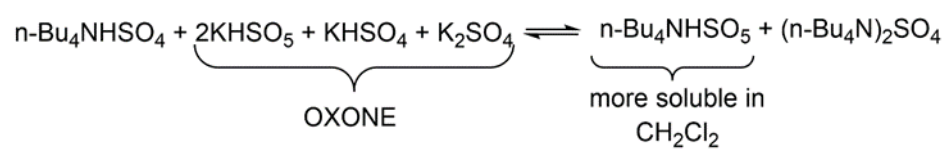

Supplement: s1 [file s1]
